# Supplementary material
Source: publisher figshare collection journal article supplement (https://tandf.figshare.com/ndownloader/files/13709315)
Supplement: Supplementary file 1 [file 13709315]

**Two new dammarane triterpenes isolated from Cleome khorassanica Bunge & Bien with cytotoxicity against DU-145 and LNCaP prostate cancer cell lines**

Seyed Ebrahim Sajjadia, Mustafa Ghanadianb,c *, Mahmoud Aghaeic, Arash Salehib,

*aDepartment of Pharmacognosy, School of Pharmacy, Isfahan University of Medical Sciences, Isfahan, Iran. sajjadi@pharm.mui.ac.ir*

*bIsfahan Pharmaceutical Sciences Research Center, Isfahan University of Medical Sciences, Isfahan, Iran. ghannadian@gmail.com;* [*sayyedarash@gmail.com*](mailto:sayyedarash@gmail.com)

*cNational Center for Natural Products Research, School of Pharmacy, University of Mississippi, Oxford, MS 38655, USA*

*dDepartment of Biochemistry, School of Pharmacy, Isfahan University of Medical Sciences, Isfahan, Iran. maghaei@pharm.mui.ac.ir*

*Abstract*

From the aerial parts of Cleome khorassanica Bunge & Bien, a new 3-oxo-4-oxa-A-homo-25,26,27-trinordammarano-24,20-lactone triterpene (1), a new natural product 20,25-dihydroxy-3-oxodammarane triterpene (2), together with known 5-hydroxy-3,6,7,8,3',4',5'-heptamethoxyflavone (3), have been isolated and characterized. The chemical structure of the new compounds was determined by 1D and 2D NMR and HR tandem MS measurements. All three compounds were subjected to biological tests for evaluation of their cytotoxicity against prostate (DU-145 and LNCaP) cancer cells. Compounds 1, 2 and 3 showed cell growth inhibition in a dose dependent manner against DU-145 and LNCaP cells.

Key words: *Cleome khorassanica*, dammarane triterpene, prostate cancer cells

Correspondence: Mustafa Ghanadian, National Center for Natural Products Research, School of Pharmacy, University of Mississippi, Oxford, MS 38655, USA; E-Mail: [ghannadian@gmail.com](mailto:ghannadian@gmail.com), Tel: +1(662)2035870; +989133167326

**List of supplementary files:**

**Fig. 1s**. Chemical structures (**1-3**)isolated from *Cleome khorassanica*.

**Fig. 2s**. Cytotoxicity effect of the compounds **1-3** against A) DU-145, and B) LNCaP prostate cancer cells

**Fig. 3S** 1H NMR spectrum of compound **1** (CDCl3, 400 MHz)

**Fig. 4S** 13C NMR spectrum of compound **1** (CDCl3, 100 MHz)

**Fig. 5S** DEPT 135, and 90 of Compound **1** (CDCl3, 100 MHz)

**Fig. 6S** DQF COSY of Compound **1** (CDCl3, 400 MHz)

**Fig. 7S** HSQC spectrum of compound **1** (CDCl3, 400 MHz)

**Fig. 8S** HMBC spectrum of compound **1** (CDCl3, 400 MHz)

**Fig. 9S** ROESY spectrum of compound **1** (CDCl3, 400 MHz)

**Fig. 10S** High resolution MALDI TOF spectrum of compound **1** (Applied Biosystems 4800 MALDI TOF/TOF**)**

**Fig. 11S** 1H NMR spectrum of compound **2** (CDCl3, 400 MHz)

**Fig. 12S** 13C NMR spectrum of compound **2** (CDCl3, 100 MHz)

**Fig. 13S** DEPT 135, and 90 of Compound **2** (CDCl3, 100 MHz)

**Fig. 14S** DQF COSY of Compound **2** (CDCl3, 400 MHz)

**Fig. 15S** HSQC spectrum of compound **2** (CDCl3, 400 MHz)

**Fig. 16S** HMBC spectrum of compound **2** (CDCl3, 400 MHz)

**Fig. 17S** ROESY spectrum of compound **2** (CDCl3, 400 MHz)

**Fig. 18S** High resolution MALDI TOF spectrum of compound **2** (Applied Biosystems 4800 MALDI TOF/TOF**)**

**Fig. 19S** 1H NMR spectrum of compound **3** (CDCl3, 400 MHz)

**Fig. 20S** 13C NMR spectrum of compound **3** (CDCl3, 100 MHz)

**Fig. 21S** DEPT 135, and 90 of Compound **3** (CDCl3, 100 MHz)

**

**

**Figure 1s**. Chemical structures (**1-3**)isolated from *cleome khorassanica*.

**
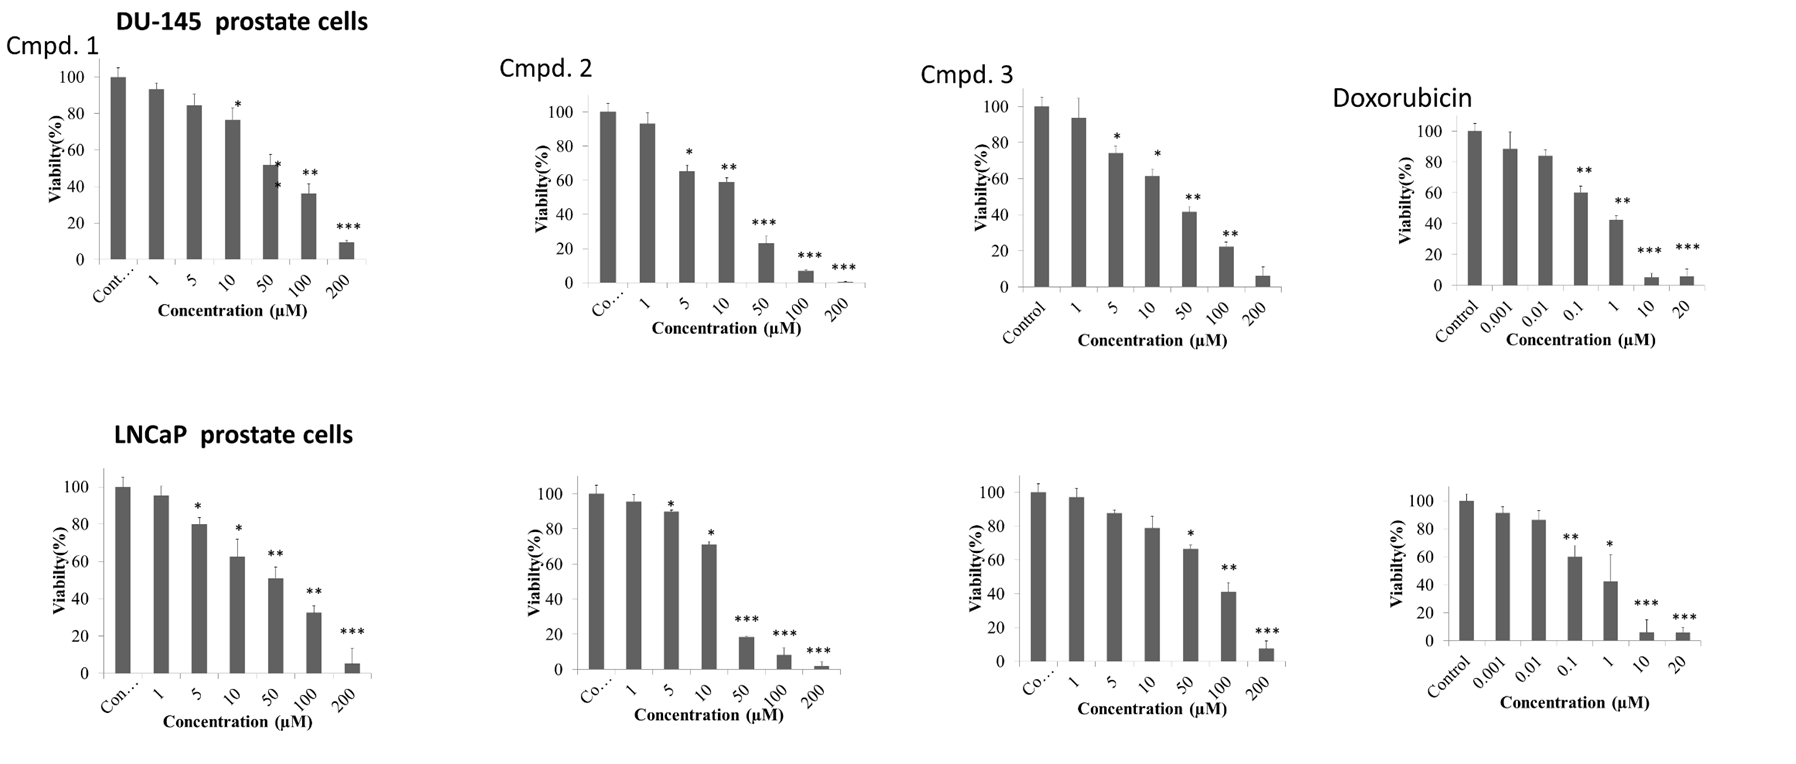
**

**Figure 2s**. Cytotoxicity effect of the compounds **1-3** against A) DU-145, and B) LNCaP prostate cancer cells. Cells were treated with different concentrations of compounds **1-3** in three replicates. Untreated cells were used as negative control and doxorubicin as positive control. Results (mean ± SD) were calculated as percent of corresponding control values. (* p < 0.5; ** p < 0.01; *** p < 0.001 *versus* control).

**Fig. 3S** 1H NMR spectrum of compound **1** (CDCl3, 400 MHz)

**Fig. 4S** 13C NMR spectrum of compound **1** (CDCl3, 100 MHz)

**Fig. 5S** DEPT 135, and 90 of Compound **1** (CDCl3, 100 MHz)

**Fig. 6S** DQF COSY of Compound **1** (CDCl3, 400 MHz)

**Fig. 7S** HSQC spectrum of compound **1** (CDCl3, 400 MHz)

**Fig. 8S** HMBC spectrum of compound **1** (CDCl3, 400 MHz)

**Fig. 9S** ROESY spectrum of compound **1** (CDCl3, 400 MHz)

**
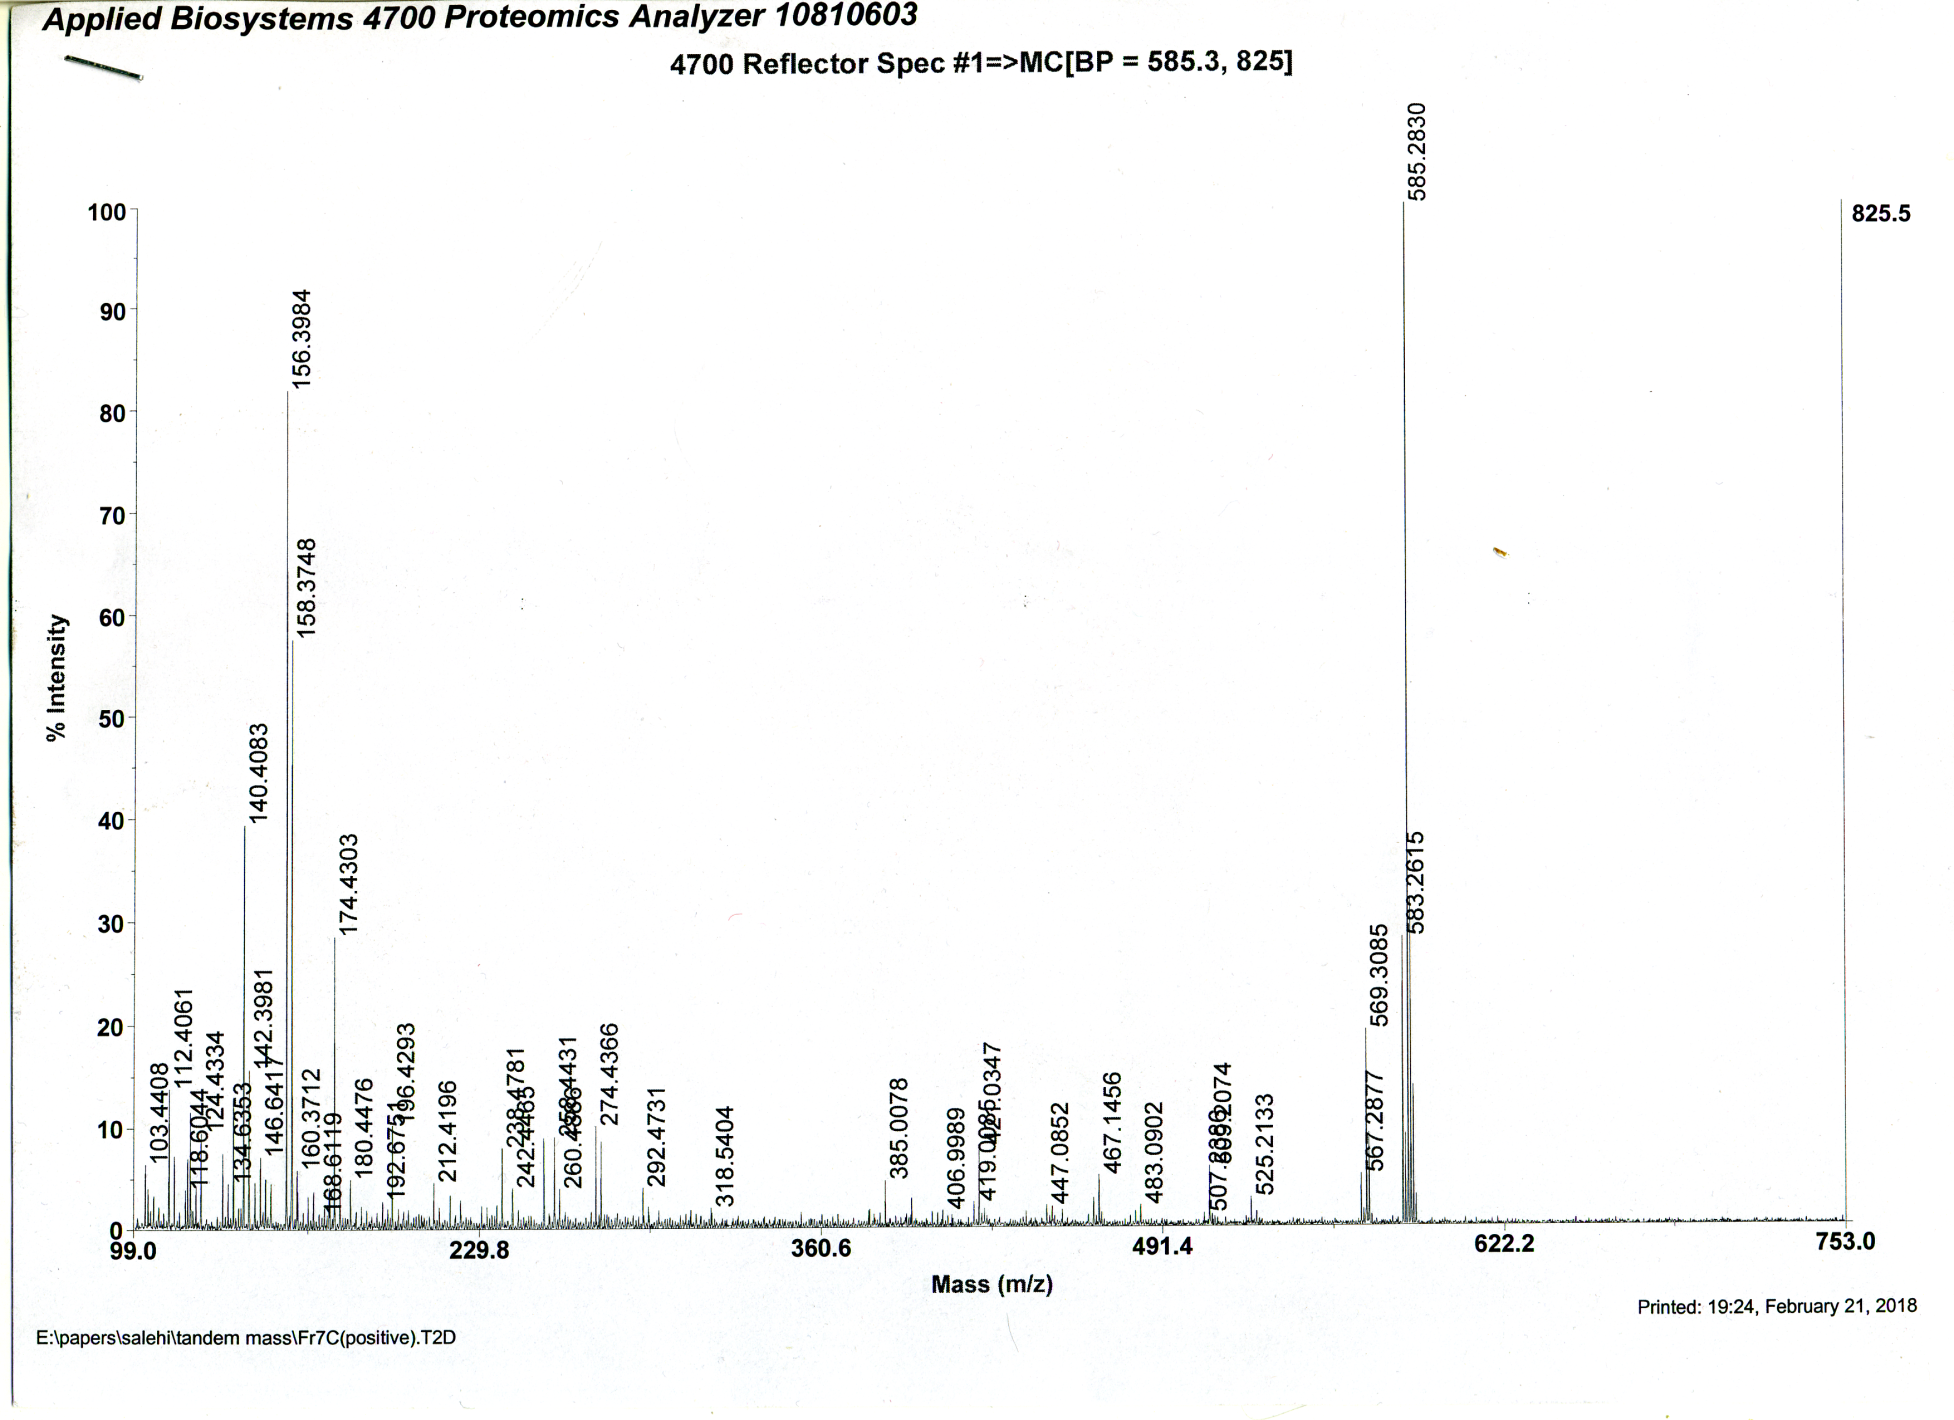
**

**Fig. 10S** High resolution MALDI TOF spectrum of compound **1** (Applied Biosystems 4800 MALDI TOF/TOF**)**

**Fig. 11S** 1H NMR spectrum of compound **2** (CDCl3, 400 MHz)

**Fig. 12S** 13C NMR spectrum of compound **2** (CDCl3, 100 MHz)

**Fig. 13S** DEPT 135, and 90 of Compound **2** (CDCl3, 100 MHz)

**Fig. 14S** DQF COSY of Compound **2** (CDCl3, 400 MHz)

**Fig. 15S** HSQC spectrum of compound **2** (CDCl3, 400 MHz)

**Fig. 16S** HMBC spectrum of compound **2** (CDCl3, 400 MHz)

**Fig. 17S** ROESY spectrum of compound **2** (CDCl3, 400 MHz)

**
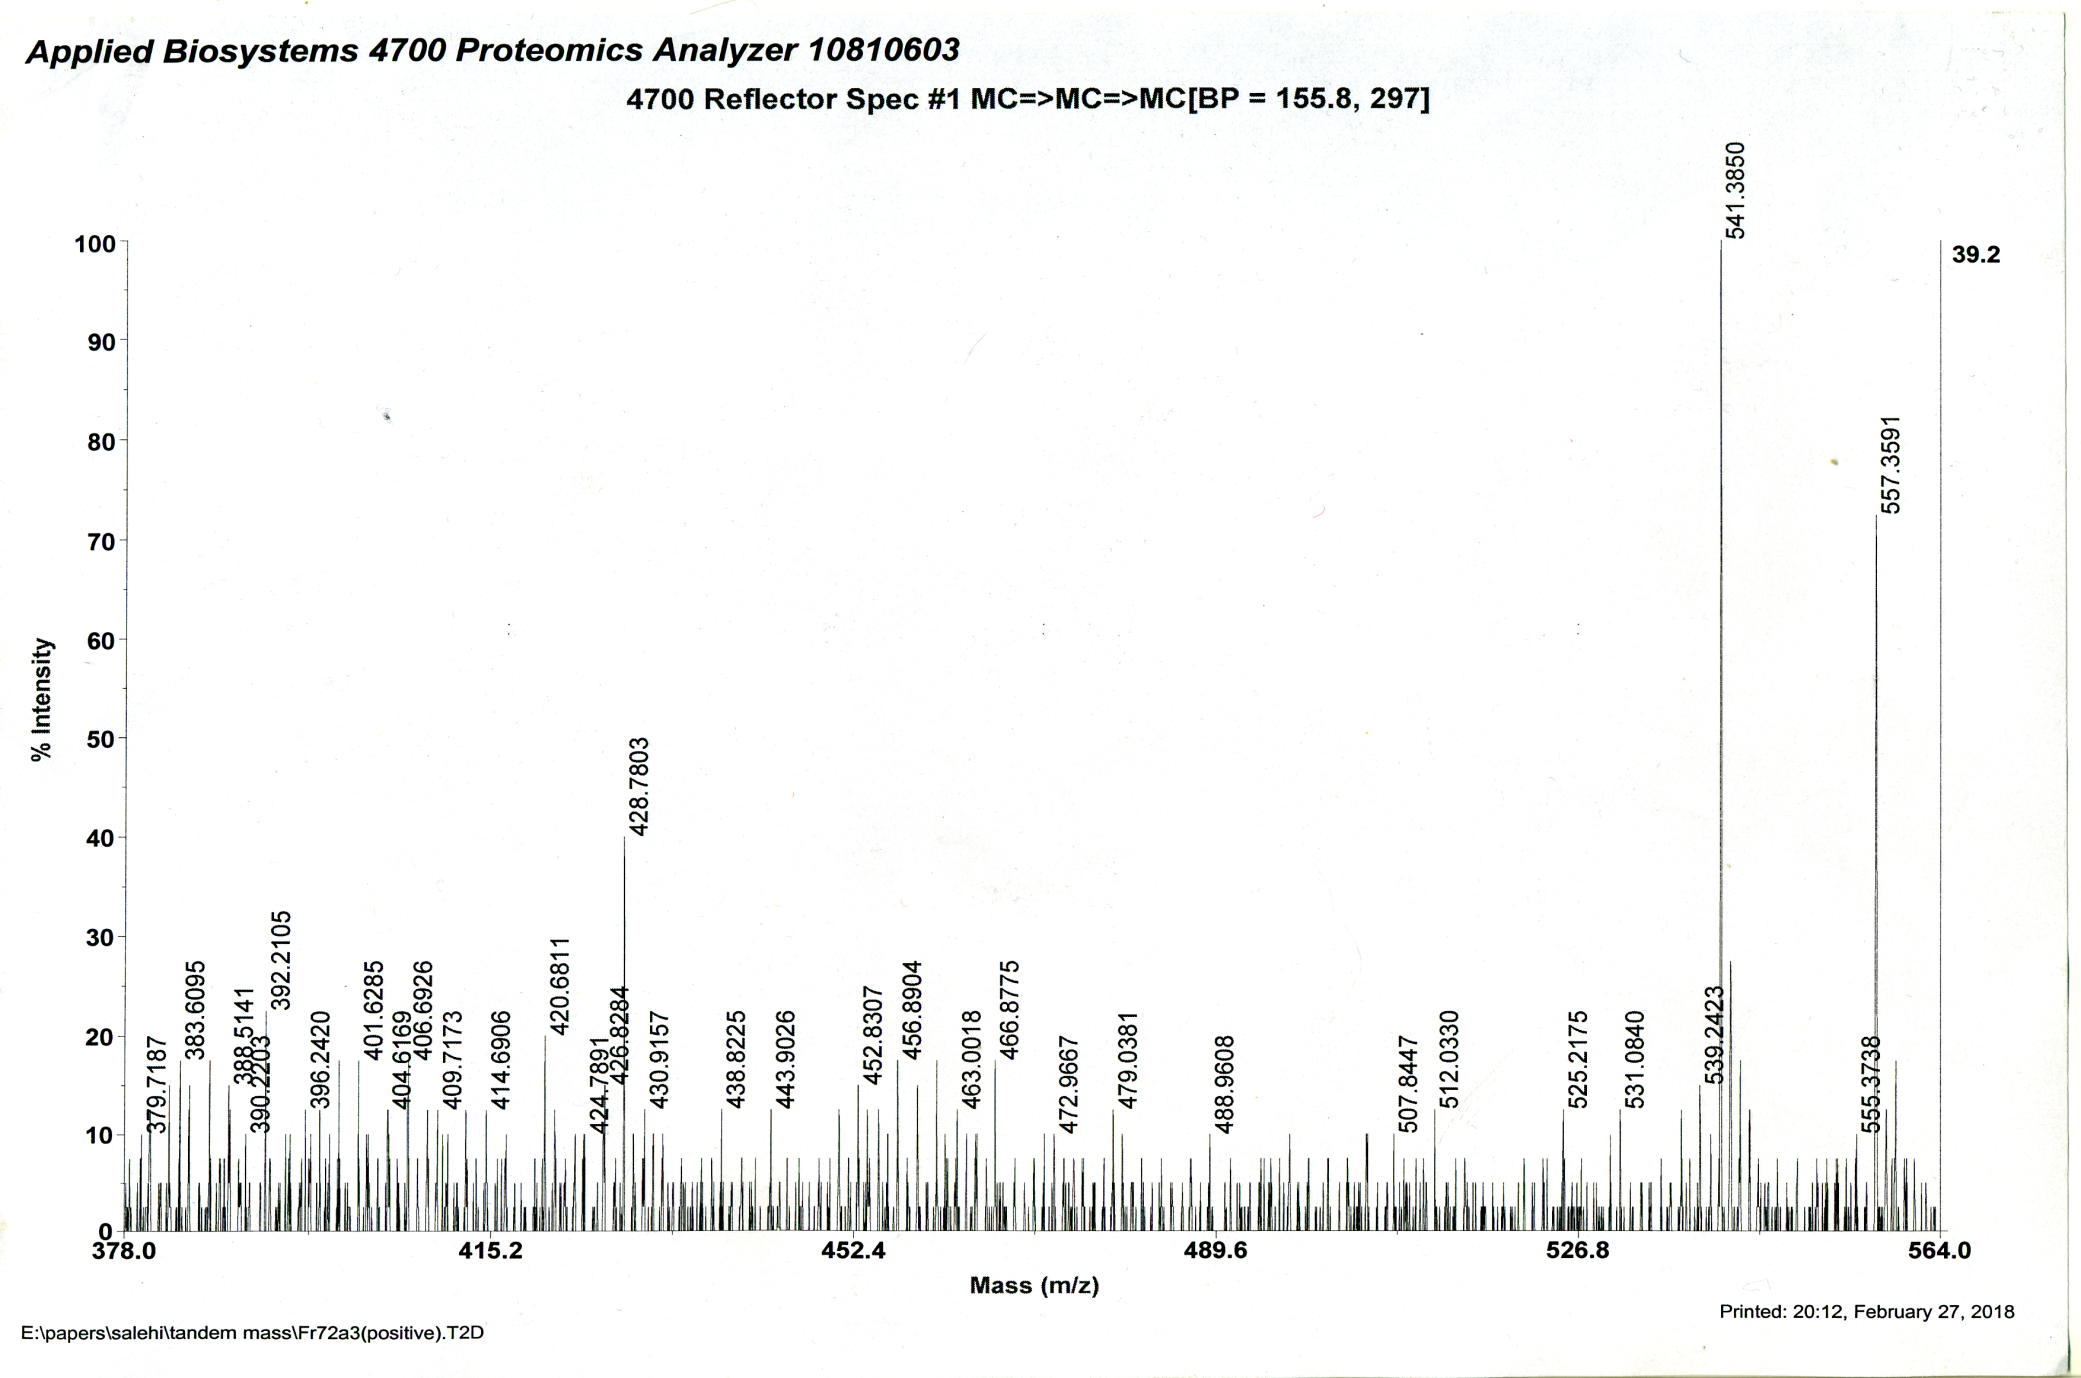
**

**Fig. 18S** High resolution MALDI TOF spectrum of compound **2** (Applied Biosystems 4800 MALDI TOF/TOF**)**

**Fig. 19S** 1H NMR spectrum of compound **3** (CDCl3, 400 MHz)

**Fig. 20S** 13C NMR spectrum of compound **3** (CDCl3, 100 MHz)

**Fig. 21S** DEPT 135 and DEPT 90 spectrum of compound **3** (CDCl3, 100 MHz)
